1 ***In vitro* activity of a novel antifungal compound, MYC-053, against clinically significant**  
2 **antifungal-resistant strains of *Candida glabrata*, *Candida auris*, *Cryptococcus neoformans*,**  
3 **and *Pneumocystis* spp.**

4  
5 Running title: Characterization of a novel antifungal MYC-053  
6

7 Tetz G<sup>a#</sup>

8 Collins M<sup>c</sup>

9 Vikina D<sup>b</sup>

10 Tetz V<sup>a</sup>

11  
12 <sup>a</sup>TGV-therapeutics, New York, NY, USA; <sup>c</sup> Pulmonary Biology, University of Cincinnati College of  
13 Medicine, Cincinnati, OH,USA; <sup>d</sup>Human Microbiology Institute, New York, NY, USA.  
14  
15

16 Address correspondence to George Tetz, [georgetets@gmail.com](mailto:georgetets@gmail.com)  
17

18 #To whom enquiries should be directed.  
19  
20  
21  
22  
23  
24  
25  
26  
27  
28  
29  
30  
31  
32  
33  
34  
35  
36  
37  
38  
39  
40

41  
42  
43  
44  
45  
46  
47  
48  
49  
50  
51  
52  
53  
54  
55  
56  
57

**ABSTRACT**

An urgent need exists for new antifungal compounds to treat fungal infections in immunocompromised patients. The aim of the current study was to investigate the potency of a novel antifungal compound, MYC-053, against the emerging yeast and yeast-like pathogens *Candida glabrata*, *Candida auris*, *Cryptococcus neoformans*, and *Pneumocystis* spp. MYC-053 was equally effective against the susceptible control strains, clinical isolates, and resistant strains, with the minimum inhibitory concentrations (MIC) of 0.125–4.0 µg/mL. Notably, unlike other antifungal compounds, MYC-053 was effective against *Pneumocystis* isolates. MYC-053 was highly effective against preformed 48-h-old yeast biofilms, with the minimal biofilm eradication concentrations equal to 1–4 times MIC. The compound was not cytotoxic against L2 and A549 cell lines at concentrations over 100 µg/ml. Further, it possessed no apparent hemolytic activity up to 1000 µg/ml (the highest concentration tested). Overall, these data indicated that MYC-053 has a broad therapeutic window and may be developed into a promising antifungal agent for the treatment and prevention of invasive fungal infections caused by yeasts and yeast-like fungi in neutropenic patients.

58 In the last decade, invasive fungal infections caused by non-*albicans* *Candida* species and other less-  
59 common emerging yeasts, such as *Cryptococcus*, have become the leading cause of mortality in  
60 immunocompromised individuals (1-4).

61 *Candida glabrata* has emerged as the most common non-*albicans* *Candida* species and a  
62 causative agent of these invasive infections. It predominantly affects neutropenic patients, e.g.,  
63 hematopoietic stem cell-transplant recipients, patients with HIV and diabetes, with high mortality rates  
64 (5). Systemic infections caused by these fungi include the associated cases of invasive candidiasis.  
65 Currently, non-*albicans* candidaemia is one of the most common causes of hospital-acquired bloodstream  
66 infections in the United States (6-9).

67 The main reason for the low efficacy of existing therapeutic options is the spread of fungal  
68 isolates with reduced susceptibility to the major classes of antimycotics (polyenes, azoles, and  
69 echinocandins) (10). The spread of multidrug resistant strains of *C. glabrata* in the US, displaying  
70 resistance to at least two classes of antifungal drugs, severely limiting treatment options, and  
71 consistently associated with increased mortality was described in recent studies (11-13). Notably,  
72 resistance to echinocandins, a novel class of antifungal agents, is also increasing among *C. glabrata*  
73 isolates, with the reported resistance rate of 3–12% in different countries (14,15).

74 Another global healthcare concern is the emerging multidrug-resistant pathogenic *Candida auris*  
75 (16,17). Unlike most other *Candida* spp., this fungus is commonly transmitted within health care facilities  
76 (18). One of the reasons for the nosocomial spread of *C. auris* is its survival on surfaces in healthcare  
77 facilities for many days (19). Recently, *C. auris* infections have been reported to cause outbreaks in over  
78 50 healthcare facilities in 15 countries (20). Moreover, drug resistance of *C. auris* exceeds that of *C.*  
79 *glabrata*, with over 41% isolates reportedly resistant to at least two antifungal classes (18).

80 *Cryptococcus neoformans* is another opportunistic pathogen and an etiologic agent of  
81 cryptococcosis, a life-threatening infection in immunocompromised hosts, particularly HIV-infected, with  
82 cancer, or solid-organ transplant recipients (4). Although the rates of cryptococcosis have dropped  
83 substantially since the development of highly active antiretroviral therapy, the mortality of HIV patients  
84 associated with cryptococcal meningitis remains high. One of the causes of treatment failure is the  
85 emergence of azole-resistant and heteroresistant mutants (21-23).

86 Another important yeast-like fungal pathogens of the immunocompromised neutropenic host are  
87 *Pneumocystis* species, which cause pneumocystis pneumonia (PcP) (24). According to the statistics of the  
88 Centres for Disease Control and Prevention, the incidence of PcP among hospitalized HIV patients in the  
89 US is 9% (CDC, 2014. *Pneumocystis pneumonia* statistics.  
90 <http://www.cdc.gov/fungal/diseases/pneumocystis-pneumonia/statistics.html>). *Pneumocystis* spp.,  
91 originally classified as protozoa, are now classified as fungi but are not susceptible to anti-fungal drugs  
92 (REF). Hence, the main therapeutic options of preventing and treating PcP are a combination of  
93 trimethoprim, sulfamethoxazole, and aerosolized pentamidine (25). Nevertheless, the therapy is  
94 ineffective for many AIDS patients, with the current mortality rate of PcP remaining high and ranging  
95 from 5 to 40%, while the mortality is 100% in non-treated patients (26).

96 In addition to the spread of antifungal resistance, biofilm formation is a global concern associated  
97 with all fungal infections, which leads to therapy failure (27-29). Biofilms formed during invasive fungal  
98 infections by yeasts and yeast-like fungi retard the penetration and diffusion of antifungal agents and  
99 enabling the fungi to survive in the presence of high antibiotic concentrations (30,31). Therefore,  
100 development of novel antifungal agents that would be effective against resistant fungi that are prevalent  
101 among neutropenic patients is at the forefront of today's medicine. In the current study, the fungicidal

102 activity of a novel antifungal compound, MYC-053 [sodium 5-[1-(3,5-dichloro-2-  
103 hydroxyphenyl)methylideneamino]-6-methyl-1,2,3,4-tetrahydro-2,4-pyrimidinedionate] (Fig. 1), which is  
104 not related to any existing classes of antifungal agents, was investigated against planktonic and biofilm-  
105 forming *Candida* spp., *Cryptococcus* spp., and *Pneumocystis* spp.  
106

## 107 RESULTS

108 ***In vitro* antifungal activity of MYC-053 against *C. glabrata*, *C. auris*, and *C. neoformans*.** The  
109 efficacy of MYC-053 against a panel of 20 *C. glabrata* strains [including seven flucanazole (FLC)-  
110 resistant and four caspofungin (CAS)-resistant strains], five *C. auris* strains, and 18 *C. neoformans* strains  
111 (including 12 FLC-resistant strains) was determined by the broth microdilution method (Table 1).  
112 Minimum inhibitory concentrations 50 (MIC<sub>50</sub>) values of MYC-053 for *C. glabrata* strains varied from  
113 0.125 to 0.5 µg/mL, while Minimum inhibitory concentrations 100 (MIC<sub>100</sub>) values were in the low  
114 µg/mL range (1–4 µg/ml). *C. auris* and *C. neoformans* strains were also sensitive to this compound, with  
115 MIC<sub>50</sub> and MIC<sub>100</sub> of 0.5–4 µg/ml. Notably, the antifungal activity of MYC-053 against the susceptible  
116 strains, including the control *C. glabrata* ATCC 90030 and *C. neoformans* ATCC 90112 strains, was a  
117 lower than that of FLC but higher than that one of CAS. In contrast, while certain resistant clinical  
118 isolates exhibited reduced susceptibility to FLC and CAS, they were highly sensitive to the same  
119 concentrations of MYC-053 as the control strains (Table 1).

120 ***In vitro* antifungal activity of MYC-053 against *Pneumocystis carinii* and *Pneumocystis***  
121 ***murina*.** The responses of *P. carinii* and *P. murina* to MYC-053 were evaluated by a cytotoxicity assay  
122 based on ATP-driven bioluminescence (32). The results, expressed as IC<sub>50</sub> after 24, 48, and 72 hours of  
123 exposure to the drug, were assigned activity ranks based on the degree of reduction of ATP compared to  
124 untreated controls (33,34) (Table 2). The exposure of *P. carinii* to 1 µg/ml MYC-053 for 72 h resulted in  
125 a level of ATP reduction that was slightly lower than that of pentamidine and can be considered as  
126 moderate activity. However, the increase of MYC-053 concentration to 10 µg/ml resulted in lower of  
127 ATP pools, compared with 1 µg/ml pentamidine. The inhibitory effect of MYC-053 against *P. murina*  
128 was higher than against *P. carinii*. In this assay, MYC-053 demonstrated comparable activity against *P.*  
129 *murina* as pentamidine, with over 94.4% reduction of the ATP pool following 72-h exposure, which is  
130 considered to indicate marked activity on the efficacy scale (34). Overall, MYC-053 effectively reduced  
131 the ATP content of both *Pneumocystis* species at microgram levels. The following IC<sub>50</sub> values were  
132 calculated over 3 d of *P. carinii* exposure to MYC-053: 3.90 µg/ml at 24 h; 2.56 µg/ml at 48 h; and 1.61  
133 µg/ml at 72 h. Against *P. murina*, the IC<sub>50</sub> values were: 3.30 µg/ml at 24h; 1.50 µg/ml at 48 h; and 0.165  
134 µg/ml at 72 h.

135 **Activity of MYC-053 against *C. glabrata* and *C. neoformans* biofilms.** The anti-biofilm effect  
136 of MYC-053, FLC, and CAS on preformed 48-h-old *C. glabrata* biofilms, and the effect of MYC-053 and  
137 FLC on cryptococcal biofilms were evaluated (Table 3). Preformed biofilms were exposed to drugs  
138 provided at concentrations equal to 1–64 times those of their MICs. MYC-053 significantly reduced the  
139 CFU of preformed biofilms of both *C. glabrata* and *C. neoformans* after 24 h of incubation, starting at a  
140 concentration of 1× MIC. MYC-053 at a concentration of 1× MIC decreased the number of viable fungi  
141 in all strains by more than 50%; this value was recorded as the minimum biofilm eradication  
142 concentration, MBEC<sub>50</sub>. Moreover, MYC-053 was the only drug that showed MBEC<sub>90</sub> values equal to 1–  
143 4 times its MIC. In the assay, higher relative concentrations of FLC and CAS were required to kill yeasts  
144 in preformed biofilms than MYC-053. The MBEC<sub>50</sub> and MBEC<sub>90</sub> values of FLC and CAS against the

145 tested preformed *C. glabrata* biofilms were equal to 4–64 times and 1–32 times their MICs, respectively.  
146 Similar data with high relative MBEC<sub>50</sub> and MBEC<sub>90</sub> concentrations of FLC required were obtained  
147 against *C. neoformans* biofilms. CAS efficacy was not tested against *C. neoformans* biofilms in this  
148 assay, as this microorganism is known to be resistant both *in vitro* and *in vivo* to echinocandins (REF).

149 **MYC-053 possesses no apparent cytotoxic or hemolytic activities.** Since the *in vitro* antifungal  
150 activity of MYC-053 was demonstrated in different experimental set-ups, we next evaluated the possible  
151 cytotoxicity of this molecule in two eukaryotic cell lines. L2 and A549 cells were treated with increasing  
152 concentrations of MYC-053 (0.1–100 µg/ml) for up to 72 h. The cytotoxicity was evaluated using an ATP  
153 release assay, as described in the Materials and methods with three independent repeats at each time point  
154 (35). According to the EU classification criteria, MYC-053 was not toxic to either cell line, with IC<sub>50</sub>  
155 values over 100 µg/ml (36,37). To evaluate the possible hemolytic activity of MYC-053, human  
156 erythrocytes were exposed to increasing concentrations of the compound (up to 1000 µg/ml) for 6 h. No  
157 significant difference was observed between the control (dimethyl sulfoxide, DMSO) and MYC-053.  
158

## 159 DISCUSSION

160 In the United States, invasive candidiasis has become a common healthcare-associated infection.  
161 Currently, non-*albicans* *Candida* spp. are the major cause of morbidity in immunocompromised patients,  
162 including patients with HIV, cancer, hematological malignancies, diabetes, and solid organ transplants.  
163 The prevalence of *C. glabrata* among non-*albicans* *Candida* infections has been constantly increasing  
164 over time, and this fungus is now registered as the most frequently isolated fungus species from patients  
165 (38). The main reasons for the failure of the existing therapeutic options is an increase in antifungal  
166 resistance and low sensitivity of fungal biofilms to the existing antibiotics (39-41). Another serious global  
167 health threat represented by non-*albicans* *Candida* species is *C. auris*, a recently discovered, rapidly  
168 emerging fungal pathogen (42). Infections due to *C. auris* are predominantly hospital-acquired and up to  
169 30% are represented by multidrug resistant strains, including ones resistant to all three classes of  
170 antifungal agents, and are associated with high mortality rates (43). Although the incidence of infections  
171 caused by *Cryptococcus* spp. and *Pneumocystis* spp. has decreased since the introduction of HAART,  
172 which partially restores the function of the immune system, opportunistic infections caused by these fungi  
173 continue to contribute to the mortality of the immunocompromised hosts (44,45).

174 In the current study, we described a novel antifungal drug candidate, MYC-053, which exhibited  
175 a high level of antimicrobial activity against *C. glabrata*, *C. auris*, *C. neoformans*, and *Pneumocystis* spp.  
176 *in vitro*. Importantly, the MIC experiment revealed that MYC-053 exerted a pronounced cidal effect  
177 against resistant fungal isolates at concentrations identical to the ones killing susceptible control fungal  
178 strains. These data correspond well with the notion that MYC-053 is a representative of a novel chemical  
179 class of antifungal agents; it is not relevant to the existing antifungal agents whose use is frequently  
180 characterized by cross-resistance (46). Notably, MYC-053 was effective against *C. auris* that is often  
181 multidrug-resistant (47). Although we have only tested the activity of MYC-053 against five *C. auris*  
182 strains, low SEM values in the assay suggested high precision of the measurements allowing us to  
183 determine the mean MIC<sub>50</sub> as 1 µg/ml and MIC<sub>100</sub> as 4 µg/ml. Despite the fact that MIC values of MYC-  
184 053 against *C. auris* were higher than against *C. glabrata*, these values were nonetheless promising given  
185 the low susceptibility of certain tested strains to FLC and CAS, with MIC values over 64 µg/mL for these  
186 antifungals.

187 MYC-053 was also effective against *C. neoformans*, with MIC values starting at 1.0 µg/ml. These  
188 concentrations were dramatically different from the FLC MIC values. Although we did not test the  
189 sensitivity of *C. neoformans* strains against other azoles, it is known that this fungus is commonly cross-  
190 resistant to other antifungal agents of this class, including voriconazole (48,49). Therefore, we propose  
191 that MYC-053 might be effective against other azole-resistant strains of *C. neoformans*.

192 This investigation also revealed that MYC-053 was effective against *Pneumocystis* spp., other  
193 yeast-like pathogens that are challenging to treat in neutropenic patients. The anti-pneumocystis activity  
194 of MYC-053 was promising since, despite being originally classed as protozoa, *Pneumocystis* spp. are  
195 now classified as fungi and continue to be generally treated with antibacterial and antiprotozoan  
196 medications (32, 50). The determination of ATP levels for the assessment of MYC-053 activity against  
197 *Pneumocystis* constitutes a highly sensitive assay enabling the reduction of the number of tested  
198 organisms (33). The activity of MYC-053 was considered as marked and was comparable to the activity  
199 of pentamidine against *P. murina* at the 72-h time point. To the best of our knowledge, MYC-053 is the  
200 first new synthetic compound that can be potentially used against *Pneumocystis* spp., *Candida* spp., and  
201 *Cryptococcus* spp..

202 To determine whether MYC-053 was active against preformed yeast biofilms, its MBEC values  
203 were evaluated at concentrations equal to multiples of the MIC values. In the assay, 48-h-old preformed  
204 biofilms of susceptible and clinical isolates were evaluated. At a concentration equal to MIC, MYC-053  
205 caused a 50% reduction of the viable cell counts in all studied fungal biofilms. The MBEC<sub>90</sub> values of  
206 MYC-053 were equal to 1–4-time multiples of MIC values. Notably, the MIC/MBEC<sub>50/90</sub> ratios of MYC-  
207 053 were significantly lower than those of the control antifungals FLC and CAS. In summary, MYC-053  
208 was equally effective against sessile and planktonic non-resistant organisms and multiresistant clinical  
209 isolates.

210 Importantly, the potent antifungal activity of MYC-053 was not associated with any cytotoxicity  
211 and hemolytic activity, as evaluated in a 72-h assay, suggesting a high therapeutic index. Therefore,  
212 considering the clinical efficacy of an antifungal agent based on its anti-biofilm activity but not on the  
213 MIC criterion, it would be easy to conclude that the concentrations of FLC and CAS required to eliminate  
214 biofilms formed by the resistant strains of *C. glabrata* and *C. neoformans* cannot be achieved in human  
215 because of the toxicity limitations (51,52). At the same time, the high therapeutic window of MYC-053,  
216 with low toxicity and high anti-biofilm activity render the data promising. These findings suggest that  
217 MYC-053 may be used to treat of fungal infections that involve biofilm formation.

218 Taken together, the results of the current study on the efficacy of MYC-053 against certain yeasts  
219 and yeast-like pathogens, including ones in biofilm state, indicate the possibility of developing MYC-053  
220 further into an antifungal drug candidate; however, it requires more *in vivo* research.

221

## 222 MATERIALS AND METHODS

223 **The test substance and antimicrobials.** MYC-053 was synthesized by TGV-inhalonix Inc.  
224 (Wilmington, DE); FLC, CAS, and pentamidine were purchased from Sigma Aldrich (St Louis, MO).

225 **Fungal strains.** Forty-four fungal species were used in this study. *C. glabrata* CG1, *C. glabrata*  
226 CG2, *C. glabrata* CG3, *C. glabrata* CG4, *C. glabrata* CG5, *C. glabrata* CG6, *C. glabrata* CG7, *C.*  
227 *glabrata* CG8, *C. glabrata* CG9, *C. glabrata* CG10, *C. auris* CAU1, *C. auris* CAU2, *C. auris* CAU3, *C.*  
228 *neoformans* CN1, *C. neoformans* CN2, *C. neoformans* CN3, *C. neoformans* CN4, *C. neoformans* CN5, *C.*  
229 *neoformans* CN6, *C. neoformans* CN7, *C. neoformans* CN8, *C. neoformans* CN9, and *C. neoformans*



230 CN10 were obtained from the Fungus Testing Laboratory at the University of Texas Health Science  
231 Center (San Antonio, TX). *C. glabrata* MR-V32, *C. glabrata* MR-V35, *C. glabrata* MR-V51, *C. glabrata*  
232 MR-V16, *C. glabrata* MR-V18, *C. glabrata* MR-V19, *C. glabrata* SS-V120, *C. glabrata* SS-V114, *C.*  
233 *glabrata* SS-V10, *C. auris* V-2016-1, *C. auris* V-2016-2, *C. neoformans* RR-94, *C. neoformans* RR-112,  
234 *C. neoformans* RR-1025, *C. neoformans* HR-30, *C. neoformans* HR-02, *C. neoformans* SS-18, and *C.*  
235 *neoformans* SS-10 were provided by Dr. V. Tetz (Human Microbiology Institute) from a private  
236 collection. *P. carinii* and *P. murina* were obtained from Melanie Cushion's laboratory at the University of  
237 Cincinnati (Cincinnati, OH). The control strains were *C. glabrata* ATCC 90030 and *C. neoformans*  
238 ATCC 90112 obtained from the American Type Culture Collection (ATCC, Rockville, USA). *C. glabrata*  
239 and *C. auris* isolates were subcultured on Sabouraud dextrose agar before testing (Oxoid Ltd.,  
240 Basingstoke, UK).

241 ***In vitro* antifungal susceptibility testing.** Microdilution broth susceptibility testing was  
242 performed in duplicate according to the CLSI M27-A3 method in RPMI-1640 growth medium (Sigma  
243 Aldrich) to determine the MIC values (53). Standard inoculum for yeast testing was  $2.5 \times 10^3$  CFU/ml.  
244 FLC and CAS were dissolved in DMSO (Sigma Aldrich), whereas MYC-053 was dissolved in sterile  
245 water. MIC<sub>50</sub> was defined as the lowest concentration of a drug that caused a 50% decrease in culture  
246 turbidity compared to the growth control. MIC<sub>100</sub> was defined as the lowest concentration of the drug that  
247 resulted in no visual growth after 24 h of incubation at 35°C. Fungal isolates were categorized as  
248 susceptible, intermediate, or resistant, according to the susceptibility breakpoints for antifungals based on  
249 CLSI criteria (54,55). *C. glabrata* strains were susceptible to FLC at MIC  $\leq 8$   $\mu\text{g/ml}$ ; intermediate at 8–64  
250  $\mu\text{g/ml}$ ; and resistant at MIC  $\geq 64$   $\mu\text{g/ml}$ . MIC values for CAS were interpreted to indicate susceptible  
251 strains at  $\leq 0.25$   $\mu\text{g/ml}$ ; intermediate strains at 0.5  $\mu\text{g/ml}$ ; and resistant strains  $\geq 1$   $\mu\text{g/ml}$ . No established *C.*  
252 *auris*-specific susceptibility breakpoints are currently available. Therefore, the same susceptibility  
253 breakpoints as for *C. glabrata* were used. *C. neoformans* strains were susceptible to FLC. No accepted  
254 *Cryptococcus* interpretive breakpoints are currently available. Therefore, only potential breakpoints for  
255 FLC against *C. neoformans* were used, as follows: susceptible,  $\leq 2$  mg/l; resistant,  $> 2$  mg/l (56).

256 ***In vitro* P. carinii and P. murina ATP assays.** MYC-053 was diluted directly in the culture  
257 medium (0.1, 1, 10, and 50  $\mu\text{g/ml}$ ). The culture medium was RPMI-1640 containing 20% horse serum,  
258 1% Minimum essential medium (MEM) vitamin solution, 1% MEM Nonessential amino acids (NEAA),  
259 200 U/ml penicillin, and 0.2 mg/ml streptomycin (Sigma Aldrich). The medium alone and medium  
260 containing 10  $\mu\text{g/ml}$  ampicillin (Sigma Aldrich) were the negative controls. Medium supplemented with 1  
261  $\mu\text{g/ml}$  pentamidine isethionate was the positive control. Cryopreserved and characterized *P. carinii*  
262 isolated from the rat lung tissue and *P. murina* isolated from the mouse lung tissue were distributed into  
263 triplicate wells of 48-well plates (final volume of 500  $\mu\text{l}$  and a final concentration of  $5 \times 10^7$  nuclei/ml for  
264 *P. carinii* and  $5 \times 10^6$  for *P. murina*). The controls and diluted compounds were added to the cultures and  
265 incubated at 35°C under 5% CO<sub>2</sub>. After 24, 48, and 72 h, 10% of the well volume was removed and ATP  
266 content was determined using the ATP-Lite luciferin-luciferase assay (Perkin-Elmer, Waltham, MA). The  
267 ATP-associated luminescence was determined using a spectrophotometer (PolarSTAR OPTIMA, BMG-  
268 Labtech, Germany). An each sample was examined microscopically on the final day of the assay to rule  
269 out the presence of bacteria. An quench control assay to determine compound interference in the  
270 luciferin/luciferase reaction was negative at all tested concentrations. Background luminescence was  
271 subtracted and triplicate well readings were averaged. For each time point, the percent reduction in ATP  
272 content in all groups was calculated as follows: [media control – (experimental/media control)]  $\times 100$ .

273 The 50% inhibitory concentration (IC<sub>50</sub>) was calculated using INSTAT linear regression program  
274 (GraphPad Software Inc., San Diego, CA).

275 **Effect of MYC-053 on preformed fungal biofilms.** A standardized *C. glabrata* or *C.*  
276 *neoformans* culture inoculum (200 µl; 5 × 10<sup>5</sup> CFU/ml) in RPMI-1640 was added to each well of a 96-  
277 well round-bottom polystyrene tissue culture microtiter plate (Sarstedt, Nümbrecht, Germany) (57,58).  
278 Following 48-h incubation at 35°C, biofilm samples were washed twice with phosphate-buffered saline to  
279 remove non-adherent cells and then exposed for 24 h to 200 µl of RPMI-1640 containing MYC-053,  
280 FLC, or CAS at concentrations equal to 1, 2, 4, 8, 16, 32, and 64 times their MICs. Untreated biofilms  
281 were used as negative controls. The number of viable fungi in the biofilm was determined by estimating  
282 the CFU number. Briefly, to estimate the CFU number, following exposure, well contents were aspirated  
283 to prevent antimicrobial carryover, and each well was washed three times with sterile deionized water.  
284 Biofilms were scraped thoroughly, with a particular attention to well edges (27). The well contents were  
285 aspirated and placed in 2 ml of isotonic phosphate buffer (0.15 M, pH 7.2), and the total fungal CFU  
286 number was determined by serial dilution and plating on SDA and incubated for 24h at 35°C. Data were  
287 log<sub>10</sub>-transformed and were compared with data for untreated biofilms. The MBEC values of drugs were  
288 defined as the concentrations of drug that killed 50% (MBEC<sub>50</sub>) or 90% (MBEC<sub>90</sub>) of yeasts in preformed  
289 48-h-old biofilms. All assays included three replicates and were repeated in three independent  
290 experiments.

291 **Cytotoxicity assay.** The cytotoxicity of MYC-057 was determined using two human L2 and  
292 A549 cell lines (from Melanie Cushion's laboratory at the University of Cincinnati (Cincinnati, OH))  
293 (59). Briefly, cultured cells were plated at 2 × 10<sup>5</sup>/ml in DMEM/F12 medium supplemented with L-  
294 glutamine (2.45 mM), 50 IE/ml penicillin, 50 µg/ml streptomycin and 10% fetal calf serum in a moist  
295 atmosphere with 5% (v/v) CO<sub>2</sub> and grown at 37°C to confluent monolayers. The medium was removed  
296 and replaced with fresh medium containing the control agent Antimycin A and increasing concentrations  
297 of test compounds. Cell viability was evaluated in triplicate assays at three time points (24, 48, and 72 h),  
298 performed in three wells. The medium was aspirated from the wells, the adherent cells were lysed with  
299 0.1 M NaOH, and ATP content was assayed in a portion of the lysate using the luciferin-luciferase assay,  
300 according to the protocol provided with the ATP-Lite assay kit (Perkin-Elmer, Waltham, MA). The  
301 background luminescence was subtracted and replicate well readings were averaged. For each time point,  
302 percent reduction in ATP content in all groups and IC<sub>50</sub> was calculated as for the in vitro Pneumocystis  
303 ATP assays.

304 **Hemolytic activity.** Hemolysis assay was used to determine the potential toxicity of MYC-053.  
305 Human erythrocytes from a healthy adult donor were used, as described previously (60,61,62), with a few  
306 modifications. MYC-053 was mixed with a 3% (v/v) suspension of washed erythrocytes (in sterile  
307 phosphate-buffered saline) for final MYC-053 concentrations of 100–1000 µg/ml, and incubated at 37°C  
308 for 3 h in a 96-well plate (Sarstedt). A solution (0.1%) of Triton X-100 (G-Biosciences, St. Louis, MO), a  
309 known hemolytic agent, was used as a positive control and DMSO was used as a negative control.  
310 Following 6 h of incubation at 36°C, samples were centrifuged and the supernatants were transferred to a  
311 96-well plate to evaluate erythrocyte lysis at 405 nm (Stat fax-2100, Awareness Technology Inc., Palm  
312 City, FL) (60).

313 **Statistical analysis.** The Mann-Whitney *U*-test was used to evaluate the differences between  
314 antifungal-treated and control samples. Differences at *P* ≤ 0.05 were considered significant. The non-  
315 parametric paired Wilcoxon signed-rank test was employed to analyze the pre- and post-challenge



316 differences, and  $P < 0.05$  was considered significant. All assays were conducted in triplicate, and were  
317 repeated in three independent experiments.

318

### 319 **ACKNOWLEDGMENTS**

320 This work utilized NIAID's suite of preclinical services for in vitro assessment (Contract No.  
321 HHSNHHSN272201100018I, with University of Texas Health Sciences Center, San Antonio). We also  
322 like to thank Nathan Wiederhold and Thomas Patterson for performing the MIC testing and for providing  
323 additional advices.

324

325 **Funding:** This research received no specific grant from any funding agency in the public, commercial, or  
326 not-for-profit sectors.

327

328 **Conflict of interest:** None declared.

329

330 **Ethical approval:** Not required.

331

332

333

334

335

336

337

338

339

340

341

342

343

344

345

346

347

348

349

350

351

352

353

354

355

356

357

358

359

360  
361  
362  
363

## REFERENCES

- 364 1. **Kullberg BJ, Vasquez J, Mootsikapun P, Nucci M, Paiva J-A, Garbino J, Yan JL, Aram**  
365 **J, Capparella MR, Conte U, Schlamm H, Swanson R, Herbrecht R.** 2017. Efficacy of anidulafungin  
366 in 539 patients with invasive candidiasis: a patient-level pooled analysis of six clinical trials. *Journal of*  
367 *Antimicrobial Chemotherapy* **72**:2368–2377.
- 368 2. **Sobel J.** 2006. The emergence of non-albicans *Candida* species as causes of invasive candidiasis and  
369 candidemia. *Current Infectious Disease Reports* **8**:427-433.
- 370 3. **Taur Y, Cohen N, Dubnow S, Paskovaty A, Seo S.** 2009. Effect of Antifungal Therapy Timing on  
371 Mortality in Cancer Patients with Candidemia. *Antimicrobial Agents and Chemotherapy* **54**:184-190.
- 372 4. **Rodríguez-Cerdeira C, Arenas R, Moreno-Coutiño G, Vázquez E, Fernández R, Chang P.** 2014.  
373 Systemic Fungal Infections in Patients with human immunodeficiency virus. *Actas Dermo-*  
374 *Sifiliográficas (English Edition)* **105**:5-17.
- 375 5. **Pfaller M, Diekema D.** 2007. Epidemiology of Invasive Candidiasis: a Persistent Public Health  
376 Problem. *Clinical Microbiology Reviews* **20**:133-163.
- 377 6. **Colombo A, de Almeida Júnior J, Slavin M, Chen S, Sorrell T.** 2017. *Candida* and invasive mould  
378 diseases in non-neutropenic critically ill patients and patients with haematological cancer. *The Lancet*  
379 *Infectious Diseases*.
- 380 7. **Hachem R, Hanna H, Kontoyiannis D, Jiang Y, Raad I.** 2008. The changing epidemiology of  
381 invasive candidiasis. *Cancer* **112**:2493-2499.
- 382 8. **Lockhart S, Wagner D, Iqbal N, Pappas P, Andes D, Kauffman C, Brumble L, Hadley S, Walker**  
383 **R, Ito J, Baddley J, Chiller T, Park B.** 2011. Comparison of In Vitro Susceptibility Characteristics  
384 of *Candida* Species from Cases of Invasive Candidiasis in Solid Organ and Stem Cell Transplant  
385 Recipients: Transplant-Associated Infections Surveillance Network (TRANSNET), 2001 to 2006.  
386 *Journal of Clinical Microbiology* **49**:2404-2410.
- 387 9. **Pfaller M, Neofytos D, Diekema D, Azie N, Meier-Kriesche H, Quan S, Horn D.** 2012.  
388 Epidemiology and outcomes of candidemia in 3648 patients: data from the Prospective Antifungal  
389 Therapy (PATH Alliance®) registry, 2004–2008. *Diagnostic Microbiology and Infectious Disease*  
390 **74**:323-331.
- 391 10. **Reboli A, Shorr A, Rotstein C, Pappas P, Kett D, Schlamm H, Reisman A, Biswas P, Walsh T.**  
392 2011. Anidulafungin compared with flucanazole for treatment of candidemia and other forms of  
393 invasive candidiasis caused by *Candida albicans*: a multivariate analysis of factors associated with  
394 improved outcome. *BMC Infectious Diseases* **11**.
- 395 11. **Alexander B, Johnson M, Pfeiffer C, Jiménez-Ortigosa C, Catania J, Booker R, Castanheira M,**  
396 **Messer S, Perlin D, Pfaller M.** 2013. Increasing Echinocandin Resistance in *Candida glabrata*: Clinical  
397 Failure Correlates With Presence of FKS Mutations and Elevated Minimum Inhibitory Concentrations.  
398 *Clinical Infectious Diseases* **56**:1724-1732.
- 399 12. **Pfaller M, Castanheira M, Lockhart S, Ahlquist A, Messer S, Jones R.** 2012. Frequency of  
400 Decreased Susceptibility and Resistance to Echinocandins among Flucanazole-Resistant Bloodstream  
401 Isolates of *Candida glabrata*. *Journal of Clinical Microbiology* **50**:1199-1203.
- 402 13. **Farmakiotis D, Tarrand JJ, Kontoyiannis DP.** 2014. Drug-resistant *Candida glabrata* infection in  
403 cancer patients. *Emerging infectious diseases* **20**:1833.
- 404 14. **Healey K, Jimenez Ortigosa C, Shor E, Perlin D.** 2016. Genetic Drivers of Multidrug Resistance in  
405 *Candida glabrata*. *Frontiers in Microbiology* **7**.

- 406 15. **Thompson G, Wiederhold N, Vallor A, Villareal N, Lewis J, Patterson T.** 2008. Development of  
407 Caspofungin Resistance following Prolonged Therapy for Invasive Candidiasis Secondary to *Candida*  
408 *glabrata* Infection. *Antimicrobial Agents and Chemotherapy* **52**:3783-3785.
- 409 16. **Welsh R, Bentz M, Shams A, Houston H, Lyons A, Rose L, Litvintseva A.** 2017. Survival,  
410 Persistence, and Isolation of the Emerging Multidrug-Resistant Pathogenic Yeast *Candida auris* on a  
411 Plastic Health Care Surface. *Journal of Clinical Microbiology* **55**:2996-3005.
- 412 17. **Tsay S, Kallen A, Jackson B, Chiller T, Vallabhaneni S.** 2017. Approach to the investigation and  
413 management of patients with *Candida auris*, an emerging multidrug-resistant yeast. *Clinical Infectious*  
414 *Diseases*.
- 415 18. **Lockhart S, Etienne K, Vallabhaneni S, Farooqi J, Chowdhary A, Govender N, Colombo A, Calvo**  
416 **B, Cuomo C, Desjardins C, Berkow E, Castanheira M, Magobo R, Jabeen K, Asghar R, Meis J,**  
417 **Jackson B, Chiller T, Litvintseva A.** 2016. Simultaneous Emergence of Multidrug-Resistant *Candida*  
418 *auris* on 3 Continents Confirmed by Whole-Genome Sequencing and Epidemiological Analyses. *Clinical*  
419 *Infectious Diseases* **64**:134-140.
- 420 19. **Piedrahita C, Cadnum J, Jencson A, Shaikh A, Ghannoum M, Donskey C.** 2017. Environmental  
421 Surfaces in Healthcare Facilities are a Potential Source for Transmission of *Candida auris* and Other  
422 *Candida* Species. *Infection Control & Hospital Epidemiology* **38**:1107-1109.
- 423 20. **Vallabhaneni S, Kallen A, Tsay S, Chow N, Welsh R, Kerins J, Kemble S, Pacilli M, Black S,**  
424 **Landon E, Ridgway J, Palmore T, Zelzany A, Adams E, Quinn M, Chaturvedi S, Greenko J,**  
425 **Fernandez R, Southwick K, Furuya E, Calfee D, Hamula C, Patel G, Barrett P, Lafaro P, Berkow**  
426 **E, Moulton-Meissner H, Noble-Wang J, Fagan R, Jackson B, Lockhart S, Litvintseva A, Chiller**  
427 **T.** 2016. Investigation of the First Seven Reported Cases of *Candida auris*, a Globally Emerging Invasive,  
428 Multidrug-Resistant Fungus — United States, May 2013–August 2016. *MMWR. Morbidity and*  
429 *Mortality Weekly Report* **65**:1234-1237.
- 430 21. **Sionov E, Chang Y, Kwon-Chung K.** 2013. Azole Heteroresistance in *Cryptococcus neoformans*:  
431 Emergence of Resistant Clones with Chromosomal Disomy in the Mouse Brain during Flucanazole  
432 Treatment. *Antimicrobial Agents and Chemotherapy* **57**:5127-5130.
- 433 22. **Maligie M, Selitrennikoff C.** 2005. *Cryptococcus neoformans* Resistance to Echinocandins: (1,3) -  
434 Glucan Synthase Activity Is Sensitive to Echinocandins. *Antimicrobial Agents and Chemotherapy*  
435 **49**:2851-2856.
- 436 23. **Hanson K, Catania J, Alexander B, Perfect J.** 2017. Drug Resistance in *Cryptococcosis*.  
437 *Antimicrobial Drug Resistance* 1119-1140.
- 438 24. **Cushion MT.** 2011. *Pneumocystis*. In *Manual of Clinical Microbiology*, 10th Edition. American  
439 Society of Microbiology 1822-1835
- 440 25. **Clark A, Hemmelgarn T, Danziger-Isakov L, Teusink A.** 2015. Intravenous pentamidine for  
441 *Pneumocystis carinii/jiroveci* pneumonia prophylaxis in pediatric transplant patients. *Pediatric*  
442 *Transplantation* **19**:326-331.
- 443 26. **Lei G, Zhang C, Zimmerman M, Lee C.** 2015. Vitamin D as Supplemental Therapy for *Pneumocystis*  
444 *Pneumonia*. *Antimicrobial Agents and Chemotherapy* **60**:1289-1297.
- 445 27. **Tetz G, Artemenko N, Tetz V.** 2009. Effect of DNase and Antibiotics on Biofilm Characteristics.  
446 *Antimicrobial Agents and Chemotherapy* **53**:1204-1209.
- 447 28. **Tetz V, Tetz G.** 2010. Effect of Extracellular DNA Destruction by DNase I on Characteristics of  
448 Forming Biofilms. *DNA and Cell Biology* **29**:399-405.
- 449 29. **Sherry L, Rajendran R, Lappin D, Borghi E, Perdoni F, Falleni M, Tosi D, Smith K, Williams C,**  
450 **Jones B, Nile C, Ramage G.** 2014. Biofilms formed by *Candida albicans* bloodstream isolates display  
451 phenotypic and transcriptional heterogeneity that are associated with resistance and pathogenicity. *BMC*  
452 *Microbiology* **14**:182.

- 453 30. **Mitchell K, Taff H, Cuevas M, Reinicke E, Sanchez H, Andes D.** 2013. Role of Matrix -1,3 Glucan  
454 in Antifungal Resistance of Non-albicans Candida Biofilms. *Antimicrobial Agents and Chemotherapy*  
455 **57**:1918-1920.
- 456 31. **Oh B, Shin J, Kim M, Sung H, Lee K, Joo M, Shin M, Suh S, Ryang D.** 2011. Biofilm formation and  
457 genotyping of *Candida haemulonii*, *Candida pseudohaemulonii*, and a proposed new species (*Candida*  
458 *auris*) isolates from Korea. *Medical Mycology* **49**:98-102.
- 459 32. **Pearson R.** 1985. Pentamidine for the Treatment of *Pneumocystis carinii* Pneumonia and Other  
460 Protozoal Diseases. *Annals of Internal Medicine* **103**:782.
- 461 33. **Cushion MT, Chen F, Kloepfer N.** 1997. A cytotoxicity assay for evaluation of candidate anti-  
462 *Pneumocystis carinii* agents. *Antimicrobial Agents And Chemotherapy* **41**:379-384.
- 463 34. **Cushion M, Collins M, Hazra B, Kaneshiro E.** 2000. Effects of Atovaquone and Diospyrin-Based  
464 Drugs on the Cellular ATP of *Pneumocystis carinii* f. sp. *carinii*. *Antimicrobial Agents and*  
465 *Chemotherapy* **44**:713-719.
- 466 35. **Li AP.** 2001. Screening for human ADME/Tox drug properties in drug discovery. *Drug discovery*  
467 *today* **6**:357-366.
- 468 36. **Spielmann H, Genschow E, Liebsch M, Halle W.** 1999. Determination of the starting dose for acute  
469 oral toxicity (LD50) testing in the up and down procedure (UDP) from cytotoxicity data. *ATLA* **27**:957-  
470 966.
- 471 37. **OECD.** 1994. OECD Guidelines for the Testing of Chemicals. Organization for Economic.
- 472 38. **Pfaller M, Messer S, Moet G, Jones R, Castanheira M.** 2011. *Candida* bloodstream infections:  
473 comparison of species distribution and resistance to echinocandin and azole antifungal agents in  
474 Intensive Care Unit (ICU) and non-ICU settings in the SENTRY Antimicrobial Surveillance Program  
475 (2008–2009). *International Journal of Antimicrobial Agents* **38**:65-69.
- 476 39. **Kumamoto C.** 2002. *Candida* biofilms. *Current Opinion in Microbiology* **5**:608-611.
- 477 40. **Krcmery V, Barnes A.** 2002. Non-albicans *Candida* spp. causing fungaemia: pathogenicity and  
478 antifungal resistance. *Journal of Hospital Infection* **50**:243-260.
- 479 41. **Perlin D.** 2007. Resistance to echinocandin-class antifungal drugs. *Drug Resistance Updates* **10**:121-  
480 130.
- 481 42. **Lee W, Shin J, Uh Y, Kang M, Kim S, Park K, Jang H.** 2011. First Three Reported Cases of  
482 Nosocomial Fungemia Caused by *Candida auris*. *Journal of Clinical Microbiology* **49**:3139-3142.
- 483 43. **Navalkele B, Revankar S, Chandrasekar P.** 2017. *Candida auris*: a worrisome, globally emerging  
484 pathogen. *Expert Review of Anti-infective Therapy* **15**:819-827.
- 485 44. **Kovacs JA, Masur H.** 2000. Prophylaxis against Opportunistic Infections in Patients with Human  
486 Immunodeficiency Virus Infection. *New England Journal of Medicine* **343**:672-672.
- 487 45. **Sepkowitz K.** 1998. Effect of HAART on natural history of AIDS-related opportunistic disorders. *The*  
488 *Lancet* **351**:228-230.
- 489 46. **Panaackal A, Gribskov J, Staab J, Kirby K, Rinaldi M, Marr K.** 2006. Clinical Significance of Azole  
490 Antifungal Drug Cross-Resistance in *Candida glabrata*. *Journal of Clinical Microbiology* **44**:1740-1743.
- 491 47. **Sarma S, Upadhyay S.** 2017. Current perspective on emergence, diagnosis and drug resistance in  
492 *Candida auris*. *Infection and Drug Resistance* Volume 10:155-165.
- 493 48. **Mondon P, Petter R, Amalfitano G, Luzzati R, Concia E, Polacheck I, Kwon-Chung KJ.** 1999.  
494 Heteroresistance to Flucanazole and Voriconazole in *Cryptococcus neoformans*. *Antimicrobial Agents*  
495 *and Chemotherapy* **43**: 1856-1861
- 496 49. **Sionov E, Chang Y, Garraffo H, Kwon-Chung K.** 2009. Heteroresistance to Flucanazole in  
497 *Cryptococcus neoformans* Is Intrinsic and Associated with Virulence. *Antimicrobial Agents and*  
498 *Chemotherapy* **53**:2804-2815.

- 499 50. **Centers for Disease Control** . 1989. Guidelines for Prophylaxis Against *Pneumocystis carinii*  
500 Pneumonia for Persons Infected With Human Immunodeficiency Virus. *JAMA: The Journal of the*  
501 *American Medical Association* **262**:335.
- 502 51. **Walsh TJ, Adamson PC, Seibel NL, Flynn PM, Neely MN, Schwartz C, Miller A**. 2005.  
503 Pharmacokinetics, safety, and tolerability of caspofungin in children and adolescents. *Antimicrobial*  
504 *agents and chemotherapy* **49**: 4536-4545.
- 505 52. **Pai MP, Turpin RS, Garey KW**. 2007. Association of flucanazole area under the concentration-time  
506 curve/MIC and dose/MIC ratios with mortality in nonneutropenic patients with  
507 candidemia. *Antimicrobial agents and chemotherapy*, **51**:35-39.
- 508 53. **Clinical and Laboratory Standards Institute**. 2008. Reference method for broth dilution antifungal  
509 susceptibility testing of yeasts, 3rd ed. CLSI document M27-A3. Clinical and Laboratory Standards  
510 Institute, Wayne, PA.
- 511 54. **Pfaller M, Diekema D, Sheehan D**. 2006. Interpretive Breakpoints for Flucanazole and *Candida*  
512 Revisited: a Blueprint for the Future of Antifungal Susceptibility Testing. *Clinical Microbiology*  
513 *Reviews* **19**:435-447.
- 514 55. **Pfaller M, Diekema D, Andes D, Arendrup M, Brown S, Lockhart S, Motyl M, Perlin D**. 2011.  
515 Clinical breakpoints for the echinocandins and *Candida* revisited: Integration of molecular, clinical, and  
516 microbiological data to arrive at species-specific interpretive criteria. *Drug Resistance Updates* **14**:164-  
517 176.
- 518 56. **Sudan A, Livermore J, Howard S, Al-Nakeeb Z, Sharp A, Goodwin J, Gregson L, Warn P, Felton**  
519 **T, Perfect J, Harrison T, Hope W**. 2013. Pharmacokinetics and Pharmacodynamics of Flucanazole for  
520 Cryptococcal Meningoencephalitis: Implications for Antifungal Therapy and In Vitro Susceptibility  
521 Breakpoints. *Antimicrobial Agents and Chemotherapy* **57**:2793-2800.
- 522 57. **Pierce C, Uppuluri P, Tristan A, Wormley F, Mowat E, Ramage G, Lopez-Ribot J**. 2008. A simple  
523 and reproducible 96-well plate-based method for the formation of fungal biofilms and its application to  
524 antifungal susceptibility testing. *Nature Protocols* **3**:1494-1500.
- 525 58. **Joffe L, Schneider R, Lopes W, Azevedo R, Staats C, Kmetzsch L, Schrank A, Del Poeta M,**  
526 **Vainstein M, Rodrigues M**. 2017. The Anti-helminthic Compound Mebendazole Has Multiple  
527 Antifungal Effects against *Cryptococcus neoformans*. *Frontiers in Microbiology* **8**.
- 528 59. **Magnet S, Hartkoorn R, Székely R, Pató J, Triccas J, Schneider P, Szántai-Kis C, Órfi L,**  
529 **Chambon M, Banfi D, Bueno M, Turcatti G, Kéri G, Cole S**. 2010. Leads for antitubercular  
530 compounds from kinase inhibitor library screens. *Tuberculosis* **90**:354-360.
- 531 60. **Evans B, Nelson C, Yu S, Beavers K, Kim A, Li H, Nelson H, Giorgio T, Duvall C**. 2013. *Ex Vivo*  
532 Red Blood Cell Hemolysis Assay for the Evaluation of pH-responsive Endosomolytic Agents for  
533 Cytosolic Delivery of Biomacromolecular Drugs. *Journal of Visualized Experiments*.
- 534 61. **Laloy J, Minet V, Alpan L, Mullier F, Beken S, Toussaint O, Lucas S, Dogné J**. 2014. Impact of  
535 Silver Nanoparticles on Haemolysis, Platelet Function and Coagulation. *Nanobiomedicine* **1**:4.
- 536 62. **Kartsonis N, Nielsen J, Douglas C**. 2003. Caspofungin: the first in a new class of antifungal  
537 agents. *Drug Resistance Updates* **6**:197-218

538



539 **FIGURE CAPTIONS**

540 **FIG 1** Chemical structure of MYC-053.

541

542 **FIG 2** Percent hemolysis of human erythrocytes exposed to 100–1000 µg/ml of MYC-053. Positive  
543 control (Triton X-100); negative control (DMSO). No hemolysis was observed with any of the tested  
544 concentrations of MYC-053 up to 1000 µg/ml. Results represent the means from 3 experiments which  
545 each contained three technical replicates.

546

547

548

549

550

551

552

553

554

555

556

557

558

559

560

561

562

563

564

565

566

567

568

569

570

571

572

573

574

575

576

577

578

579

580

581

582

583

584

585

586 **TABLE 1** MIC of MYC-053 and other antifungal agents against *C. glabrata* and *C. auris*

587

| Fungal species    | Isolate number | Susceptibility to FLU* | Susceptibility to CAS** | MYC-053 |        | FLC   |        | CAS   |        |
|-------------------|----------------|------------------------|-------------------------|---------|--------|-------|--------|-------|--------|
|                   |                |                        |                         | MIC50   | MIC100 | MIC50 | MIC100 | MIC50 | MIC100 |
| <i>C.glabrata</i> | ATCC 90030     | S                      | S                       | 0.5     | 4      | 1     | 4      | 0.25  | 1      |
|                   | CG1            | I                      | N/A                     | 0.5     | 4      | 64    | –      | –     | –      |
|                   | CG2            | S                      | N/A                     | 0.5     | 4      | 0.5   | –      | –     | –      |
|                   | CG3            | I                      | N/A                     | 0.25    | 4      | 64    | –      | –     | –      |
|                   | CG4            | S                      | N/A                     | 0.5     | 2      | 4     | –      | –     | –      |
|                   | CG5            | S                      | N/A                     | 0.5     | 2      | 2     | –      | –     | –      |
|                   | CG6            | I                      | N/A                     | 0.5     | 2      | 32    | –      | –     | –      |
|                   | CG7            | I                      | N/A                     | 0.125   | 2      | 64    | –      | –     | –      |
|                   | CG8            | I                      | N/A                     | 0.5     | 4      | 32    | –      | –     | –      |
|                   | CG9            | I                      | N/A                     | 0.5     | 2      | 64    | –      | –     | –      |
|                   | CG10           | R                      | N/A                     | 0.5     | 4      | >64   | –      | –     | –      |
|                   | MR-V32         | R                      | S                       | 0.25    | 2      | >64   | >64    | 0.25  | 0.5    |

|                     |            |   |     |       |   |     |     |       |      |
|---------------------|------------|---|-----|-------|---|-----|-----|-------|------|
|                     | MR-V35     | R | R   | 0.5   | 4 | >64 | >64 | 4     | 4    |
|                     | MR-V51     | R | I   | 0.5   | 2 | >64 | >64 | 0.5   | 2    |
|                     | MR-V16     | R | R   | 0.125 | 1 | >64 | >64 | 4     | 8    |
|                     | MR-V18     | R | I   | 0.5   | 2 | >64 | >64 | 0.5   | 2    |
|                     | MR-V19     | R | R   | 0.5   | 4 | >64 | >64 | 2     | 2    |
|                     | SS-V120    | I | I   | 0.5   | 2 | 8   | 32  | 0.5   | 1    |
|                     | SS-V114    | S | S   | 0.25  | 2 | 2   | 8   | 0.125 | 0.25 |
|                     | SS-V10     | S | R   | 0.25  | 2 | 2   | 4   | 2     | 2    |
| <i>C.auris</i>      | CAU1       | S | N/A | 1     | 4 | 2   | –   | –     | –    |
|                     | CAU2       | S | N/A | 4     | 4 | 0,5 | –   | –     | –    |
|                     | CAU3       | R | N/A | 4     | 4 | >64 | –   | –     | –    |
|                     | V-2016-1   | R | R   | 2     | 4 | >64 | >64 | 2     | 2    |
|                     | V-2016-2   | R | I   | 1     | 4 | >64 | >64 | 0.5   | 2    |
| <i>C.neoformans</i> | ATCC 90030 | S | N/A | 1     | 2 | 1   | 4   |       |      |
|                     | CN1        | R | N/A | 1     | 2 | 8   | –   | –     | –    |
|                     | CN2        | S | N/A | 1     | 2 | 1   | –   | –     | –    |

|         |   |     |     |   |    |     |   |   |
|---------|---|-----|-----|---|----|-----|---|---|
| CN3     | R | N/A | 1   | 1 | 4  | –   | – | – |
| CN4     | R | N/A | 1   | 2 | 64 | –   | – | – |
| CN5     | R | N/A | 2   | 4 | 4  | –   | – | – |
| CN6     | R | N/A | 2   | 2 | 64 | –   | – | – |
| CN7     | R | N/A | 2   | 4 | 4  | –   | – | – |
| CN8     | S | N/A | 2   | 4 | 2  | –   | – | – |
| CN9     | S | N/A | 2   | 2 | 2  | –   | – | – |
| CN10    | S | N/A | 1   | 2 | 1  | –   | – | – |
| RR-94   | R | N/A | 0.5 | 2 | 64 | >64 | – | – |
| RR-112  | R | N/A | 2   | 2 | 8  | >64 | – | – |
| RR-1025 | R | N/A | 0.5 | 1 | 64 | >64 | – | – |
| HR-30   | R | N/A | 2   | 2 | 32 | >64 | – | – |
| HR-02   | R | N/A | 1   | 1 | 2  | 8   | – | – |
| SS-18   | R | N/A | 2   | 4 | 2  | >64 | – | – |
| SS-10   | S | N/A | 1   | 1 | 1  | 8   | – | – |



588 \**Candida* spp. were susceptible (S) to FLC at a MIC of  $\leq 8$   $\mu\text{g/ml}$ ; intermediate (I) at 8-64  $\mu\text{g/ml}$  and were resistant (R) (MIC  $\geq 64$   $\mu\text{g/ml}$ )  
 589 (10.1128/CMR.19.2.435-447.2006).

590 \*\* *Candida* spp were suggested as susceptible at  $\leq 0.25$   $\mu\text{g/mL}$ , intermediate at 0.5  $\mu\text{g/mL}$  and resistant  $\geq 1$   $\mu\text{g/m}$  (38)

591 **TABLE 2** IC<sub>50</sub> values for MYC-053 for *P. carinii* and *P. murina* following different exposure times in the ATP assay. Results represent the means  
 592 from 3 experiments which each contained three technical replicates.

593

| Drug                           | 24h                          | 48h                           | 72h                           |
|--------------------------------|------------------------------|-------------------------------|-------------------------------|
| <i>P. carinii</i>              |                              |                               |                               |
| Ampicillin 10 $\mu\text{g/ml}$ | 7.84                         | 1.51                          | 0                             |
| Pentamidine 1 $\mu\text{g/ml}$ | 81.14                        | 86.58                         | 86.57                         |
| MYC-053 50 $\mu\text{g/ml}$    | 96.81                        | 97.61                         | 99.21                         |
| MYC-053 10 $\mu\text{g/ml}$    | 68.26                        | 90.29                         | 95.58                         |
| MYC-053 1 $\mu\text{g/ml}$     | 14.95                        | 11.08                         | 26.77                         |
| MYC-053 0.1 $\mu\text{g/ml}$   | 0                            | 3.20                          | 13.42                         |
| IC <sub>50</sub>               | 3.90 +/-2.0 $\mu\text{g/ml}$ | 2.56 +/-0.57 $\mu\text{g/ml}$ | 1.61 +/-1.72 $\mu\text{g/ml}$ |
| <i>P. murina</i>               |                              |                               |                               |
| Ampicillin 10 $\mu\text{g/ml}$ | 2.86                         | 0.26                          | 0                             |
| Pentamidine 1 $\mu\text{g/ml}$ | 92.07                        | 97.70                         | 98.12                         |
| MYC-053 50 $\mu\text{g/ml}$    | 97.84                        | 98.89                         | 98.77                         |
| MYC-053 10 $\mu\text{g/ml}$    | 76.56                        | 98.51                         | 97.92                         |

|                  |                   |                   |                    |
|------------------|-------------------|-------------------|--------------------|
| MYC-053 1µg/ml   | 1.082             | 42.11             | 94.42              |
| MYC-053 0.1µg/ml | 0                 | 0                 | 27.82              |
| IC50             | 3.30 +/-0.19µg/ml | 1.50 +/-0.13µg/ml | 0.165 +/-0.06µg/ml |

594

595

596 **TABLE 3** Susceptibility of 48-h-old *C. glabrata* biofilms to MYC-053, FLC, and CAS, expressed as multiples of MIC values. Results represent  
 597 the means from 3 experiments which each contained three technical replicates.

598

| Fungal species    | Isolate number | MYC-053            |                    | FLC                |                    | CAS                |                    |
|-------------------|----------------|--------------------|--------------------|--------------------|--------------------|--------------------|--------------------|
|                   |                | MBEC <sub>50</sub> | MBEC <sub>90</sub> | MBEC <sub>50</sub> | MBEC <sub>90</sub> | MBEC <sub>50</sub> | MBEC <sub>90</sub> |
| <i>C.glabrata</i> | ATCC 90030     | 1                  | 2                  | 4                  | 4                  | 1                  | 4                  |
|                   | MR-V32         | 1                  | 2                  | 4                  | >64                | 4                  | 16                 |
|                   | MR-V35         | 1                  | 1                  | 8                  | >64                | 8                  | 4                  |
|                   | MR-V51         | 1                  | 2                  | 4                  | >64                | 2                  | 2                  |
|                   | MR-V16         | 1                  | 2                  | 4                  | >64                | 4                  | 32                 |
|                   | MR-V18         | 1                  | 4                  | 32                 | >64                | 2                  | 16                 |

|                     |            |   |   |    |     |    |    |
|---------------------|------------|---|---|----|-----|----|----|
|                     | MR-V19     | 1 | 2 | 16 | 32  | 4  | 32 |
|                     | SS-V120    | 1 | 1 | 8  | 8   | 2  | 4  |
|                     | SS-V114    | 1 | 4 | 4  | 32  | 4  | 32 |
|                     | SS-V10     | 1 | 1 | 4  | 16  | 16 | 32 |
| <i>C.neoformans</i> | ATCC 90030 | 1 | 2 | 2  | 16  | –  | –  |
|                     | RR-94      | 1 | 4 | 4  | >64 | –  | –  |
|                     | RR-112     | 1 | 4 | 32 | >64 | –  | –  |
|                     | RR-1025    | 1 | 1 | 8  | 32  | –  | –  |
|                     | HR-30      | 1 | 1 | 16 | 64  | –  | –  |
|                     | HR-02      | 1 | 2 | 64 | >64 | –  | –  |
|                     | SS-18      | 1 | 2 | 8  | 16  | –  | –  |
|                     | SS-10      | 1 | 1 | 4  | 16  | –  | –  |



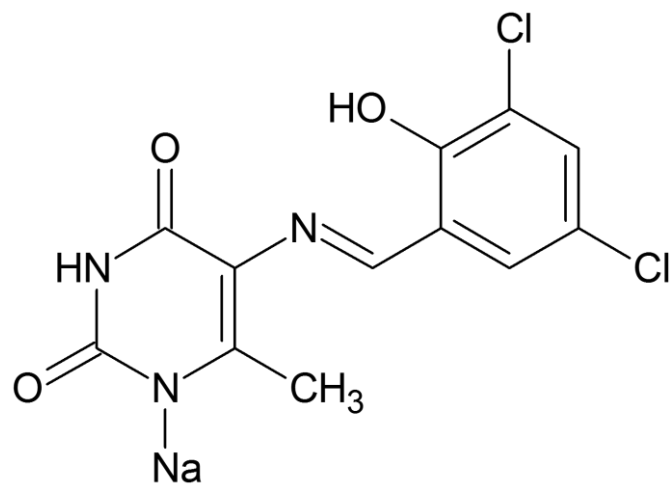

**FIG 1** Chemical structure of MYC-053.



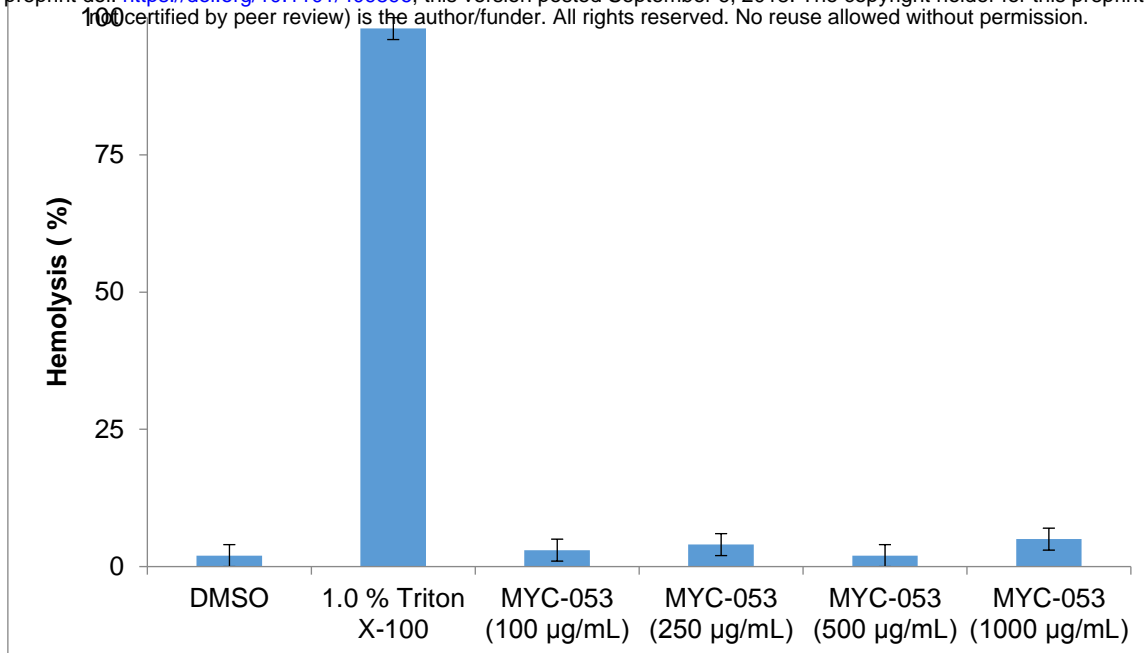

**FIG 2** Percent hemolysis of human erythrocytes exposed to 100–1000 µg/ml of MYC-053. Positive control (Triton X-100); Negative control (DMSO). No hemolysis was observed with any of the tested concentrations of MYC-053.
